# Supplementary material for: Targeted and controlled drug delivery using a temperature and ultra-violet responsive liposome with excellent breast cancer suppressing ability
Source: Royal Society of Chemistry journal article supplement (doi:10.1039/c5ra01553g), 2015-01-01
Supplement: c5ra01553g1.pdf [file c5ra01553g1.pdf]

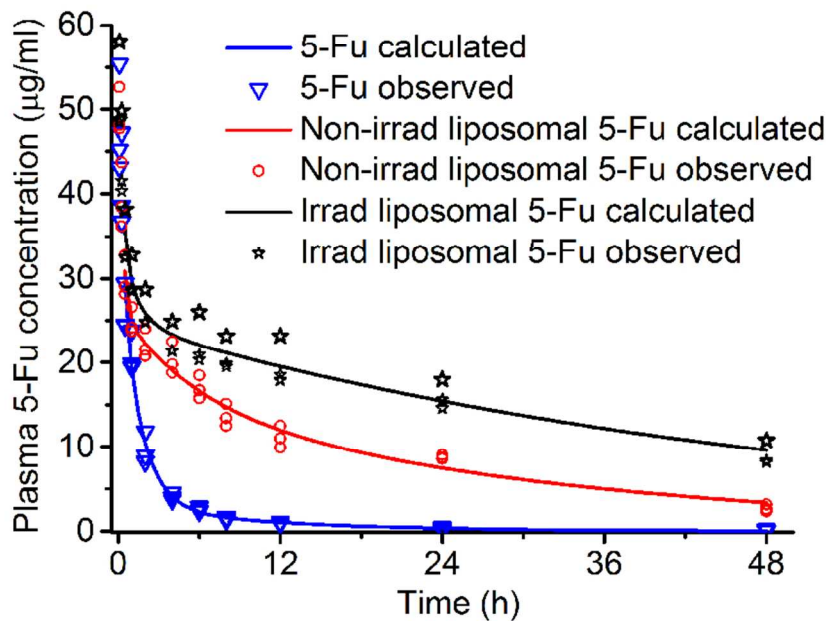

Supplementary Figure 1: Time-concentration curve of free and liposomal 5-Fu in IRC mice by PK software.  
87x61mm (300 x 300 DPI)

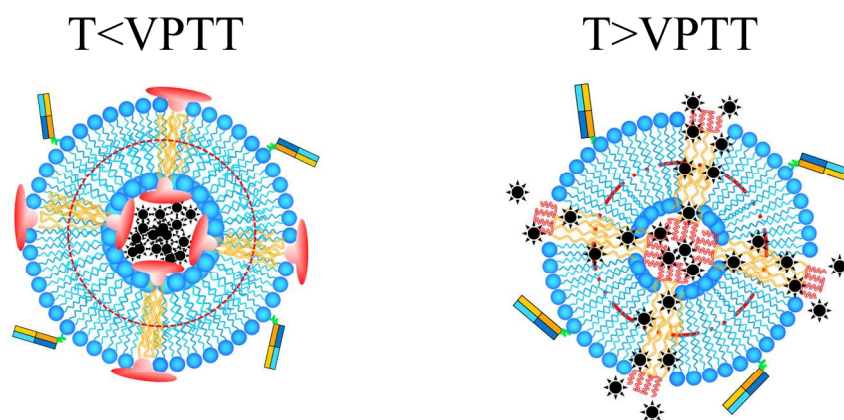

Supplementary Figure 2: Schematic representation of temperature-triggered drug release from FCTRLs  
176x87mm (300 x 300 DPI)
